# Supplementary material
Source: PubMed Central journal article supplement (PMC4249418)
Supplement: AAC.00064-14_zac011143423so1.pdf [file AAC.00064-14_zac011143423so1.pdf]

**TABLE S1** *C. albicans* strains used in this study

| Strain                 | Designation                         | Strain Background | Relevant characteristics or genotype                                                          | Source         |
|------------------------|-------------------------------------|-------------------|-----------------------------------------------------------------------------------------------|----------------|
| SC5314                 | SC5314                              | N/A               | <i>CAS5/CAS5</i>                                                                              | ATCC           |
| SCCAS5A5A66C           | <i>cas5Δ/Δ</i>                      | SC5314            | <i>cas5Δ::FRT/cas5Δ::FRT</i>                                                                  | This study     |
| SCCAS5A5A66C1B         | <i>cas5Δ/Δ+CAS5</i>                 | SCCAS5A5A66C      | <i>cas5Δ::FRT/CAS5-caSAT1</i>                                                                 | This study     |
| SCRPN4A1A21C           | <i>rpn4Δ/Δ</i>                      | SC5314            | <i>rpn4Δ::FRT/rpn4Δ::FRT</i>                                                                  | This study     |
| SCRPN4A1A21C6A         | <i>rpn4Δ/Δ+RPN4</i>                 | SCRPN4A1A21C      | <i>rpn4Δ::FRT/RPN4-caSAT1</i>                                                                 | This study     |
| SCCZF1G1D12            | <i>czf1Δ/Δ</i>                      | SC5314            | <i>czf1Δ::FRT/czf1Δ::FRT</i>                                                                  | This study     |
| BWP17                  | BWP17                               | RM1000            | <i>ura3Δ::λimm434/<br/>ura3Δ::λimm434<br/>his1::hisG/his1::hisG<br/>arg4::hisg/arg4::hisG</i> | Wilson, 1999   |
| VIC1186                | 1186                                | BWP17             | <i>cas5Δ::ARG4/<br/>cas5Δ::URA3<br/>pHIS1::his1::hisG/<br/>his1::hisG</i>                     | Bruno, 2006    |
| VIC1190                | 1190                                | 1186              | <i>cas5Δ::ARG4/<br/>cas5Δ::URA3<br/>pCAS5::HIS1::his1::hisG/<br/>his1::hisG</i>               | Bruno, 2006    |
| Clinical isolate 2-79  | 2-79                                | N/A               | Susceptible isolate                                                                           | Redding, 1994  |
| Clinical isolate 12-99 | 12-99                               | N/A               | Resistant isolate                                                                             | Redding, 1994  |
| 12-99CAS5A1A72         | 12-99 <i>cas5Δ/Δ</i>                | 12-99             | <i>cas5Δ::FRT/cas5Δ::FRT</i>                                                                  | This study     |
| G2                     | G2                                  | G1                | Susceptible isolate                                                                           | Franz, 1998    |
| G5                     | G5                                  | G2                | Resistant isolate                                                                             | Franz, 1998    |
| G5CAS5B16D3D           | G5 <i>cas5Δ/Δ</i>                   | G5                | <i>cas5Δ::FRT/cas5Δ::FRT</i>                                                                  | This study     |
| Gu2                    | Gu2                                 | Gu1               | Susceptible isolate                                                                           | Franz, 1999    |
| Gu5                    | Gu5                                 | Gu2               | Resistant isolate                                                                             | Franz, 1999    |
| Gu5CAS5A23A4A          | Gu5 <i>cas5Δ/Δ</i>                  | Gu5               | <i>cas5Δ::FRT/cas5Δ::FRT</i>                                                                  | This study     |
| S1                     | S1                                  | N/A               | Susceptible isolate                                                                           | Franz, 1999    |
| S2                     | S2                                  | S1                | Resistant isolate                                                                             | Franz, 1999    |
| S2CAS5B6C5A            | S2 <i>cas5Δ/Δ</i>                   | S2                | <i>cas5Δ::FRT/cas5Δ::FRT</i>                                                                  | This study     |
| SCUPC2R14A             | <i>UPC2<sup>G648D</sup></i>         | SC5314            | <i>UPC2<sup>G648D</sup>::FRT/<br/>UPC2<sup>G648D</sup>::FRT</i>                               | Heilmann, 2010 |
| SCUPC2R14ACAS5A5A21Y   | <i>UPC2<sup>G648D</sup>cas5Δ/Δ</i>  | SCUPC2R14A        | <i>UPC2<sup>G648D</sup>::FRT/<br/>UPC2<sup>G648D</sup>::FRT<br/>CAS5/CAS5</i>                 | This study     |
| 10C1B1M1               | <i>ERG11<sup>K143R</sup></i>        | SC5314            | <i>ERG11<sup>K143R</sup>::FRT/<br/>ERG11<sup>K143R</sup>::FRT<br/>CAS5/CAS5</i>               | Vasicek, 2013  |
| 10C1B1M1CAS5-1A51B     | <i>ERG11<sup>K143R</sup>cas5Δ/Δ</i> | 10C1B1M1          | <i>ERG11<sup>K143R</sup>::FRT/<br/>ERG11<sup>K143R</sup>::FRT<br/>cas5Δ::FRT/cas5Δ::FRT</i>   | This study     |
| SCMRR1R34A             | <i>MRR1<sup>P683S</sup></i>         | SC5314            | <i>MRR1<sup>P683S</sup>::FRT/<br/>MRR1<sup>P683S</sup>::FRT<br/>CAS5/CAS5</i>                 | Schubert, 2011 |

|                    |                                              |            |                                                                                                                                                                                     |             |
|--------------------|----------------------------------------------|------------|-------------------------------------------------------------------------------------------------------------------------------------------------------------------------------------|-------------|
| SCMRR1R34ACAS5-2A3 | <i>MRR1</i> <sup>P683S</sup> <i>cas5</i> Δ/Δ | SCMRR1R34A | <i>MRR1</i> <sup>P683S</sup> ::FRT/<br><i>MRR1</i> <sup>P683S</sup> ::FRT<br><i>cas5</i> Δ::FRT/ <i>cas5</i> Δ::FRT                                                                 | This study  |
| SCTAC1R34A         | <i>TAC1</i> <sup>G980E</sup>                 | SC5314     | <i>TAC1</i> <sup>G980E</sup> ::FRT/<br><i>TAC1</i> <sup>G980E</sup> ::FRT<br><i>CAS5</i> / <i>CAS5</i><br><i>TAC1</i> <sup>G980E</sup> ::FRT/<br><i>TAC1</i> <sup>G980E</sup> ::FRT | Sasse, 2011 |
| SCTAC1R34ACAS5-2A1 | <i>TAC1</i> <sup>G980E</sup> <i>cas5</i> Δ/Δ | SCTAC1R34A | <i>TAC1</i> <sup>G980E</sup> ::FRT/<br><i>TAC1</i> <sup>G980E</sup> ::FRT<br><i>cas5</i> Δ::FRT/ <i>cas5</i> Δ::FRT                                                                 | This study  |

**TABLE S2** Primers used in this study

| Method              | Primer          | Sequence                                        |
|---------------------|-----------------|-------------------------------------------------|
| qRT-PCR             | <i>ACT1</i> -F  | 5'-ACGGTGAAGAAGTTGCTGCTTTAGTT-3'                |
|                     | <i>ACT1</i> -R  | 5'-CGTCGTCACCGGCAAAA-3'                         |
|                     | <i>BMR1</i> -F  | 5'-ACATAAATACTTTGCCCATCCAGAA-3'                 |
|                     | <i>BMR1</i> -R  | 5'-AAGAGTTGGTTTGTAAATCGGCTAAA-3'                |
|                     | <i>CDR1</i> -F  | 5'-ATTCTAAGATGTCGTCGCAAGATG-3'                  |
|                     | <i>CDR1</i> -R  | 5'-AGTTCTGGCTAAATTCGTAATGTTTTTC-3'              |
|                     | <i>CDR2</i> -F  | 5'-TAGTCCATTCAACGGCAACATT-3'                    |
|                     | <i>CDR2</i> -R  | 5'-CACCCAGTATTTGGCATTGAAA-3'                    |
|                     | <i>CFL4</i> -F  | 5'-GCAATGGTTGACAGGTTGGAA-3'                     |
|                     | <i>CFL4</i> -R  | 5'-GCAATGTGACGATGATAAGTGACAA-3'                 |
|                     | <i>ERG11</i> -F | 5'-CCCCTATTAATTTTGTTCCTAATTTAC-3'               |
|                     | <i>ERG11</i> -R | 5'-CACGTTCTCTTCTCAGTTTAATTTCTTTC-3'             |
|                     | <i>ERG26</i> -F | 5'-ATTAGAGTGTGCGATGCCATT-3'                     |
|                     | <i>ERG26</i> -R | 5'-CGTCGTCGTAGTCGTCAC-3'                        |
|                     | <i>FTR1</i> -F  | 5'-ATTGTTGTTTCAGTGCTTTTGGC-3'                   |
|                     | <i>FTR1</i> -R  | 5'-GGTCGGAACCTACCACCCATAGA-3'                   |
|                     | <i>PGA13</i> -F | 5'-CTCCGAAGAAGAAGGAAGCGT-3'                     |
|                     | <i>PGA13</i> -R | 5'-GGTGAAATCAGTGACGGTGACTT-3'                   |
|                     | <i>PGA31</i> -F | 5'-CTTTCCTTTGATGGTCCGACT-3'                     |
|                     | <i>PGA31</i> -R | 5'-GGGTCATTGATGTTCTTGGCA-3'                     |
| Mutant construction | <i>CAS5</i> -A  | 5'-TTCAACTTCAAGGT <u>ACCT</u> GTTGATATTCTA-3'   |
|                     | <i>CAS5</i> -B  | 5'-CTAACGGT <u>CTCGAG</u> AAATTTTGTGATAGTT-3'   |
|                     | <i>CAS5</i> -C  | 5'-ATTGTGGTAAC <u>CCGCGG</u> TAAATCGTAAAGATA-3' |
|                     | <i>CAS5</i> -D  | 5'-GCATATTTAGGAGCT <u>CCTAGT</u> GGTGATTTA-3'   |
|                     | <i>CAS5</i> -E  | 5'-GCATACTGCATATTTAG <u>CTCGAG</u> CTAGTGG-3'   |
|                     | <i>RPN4</i> -A  | 5'-AGATCAATATAG <u>GGGCC</u> TAAAGGACATCTT-3'   |
|                     | <i>RPN4</i> -B  | 5'-GTGTATTATTGG <u>CTCGAG</u> TAAAAGTGTTGT-3'   |
|                     | <i>RPN4</i> -C  | 5'-TAGATTTAAT <u>CCGCGG</u> AGCTAAAGAGAATG-3'   |
|                     | <i>RPN4</i> -D  | 5'-CTGGTGAAGAGCTCTAAAGTGATATTATTG-3'            |
|                     | <i>RPN4</i> -E  | 5'-CTGGTGAAGAACT <u>CGAGAG</u> TGATATTATTG-3'   |
|                     | <i>CZF1</i> -A  | 5'-GCAAAATTCAAAGGGCCCGACCTAATTC-3'              |
|                     | <i>CZF1</i> -B  | 5'-GTGGTTGTG <u>CTCGAG</u> GAGAGGTATTGG-3'      |
|                     | <i>CZF1</i> -C  | 5'-CAATTGAAGCGGCCGCGTTTGGTAGAATC-3'             |
|                     | <i>CZF1</i> -D  | 5'-GTCAACTTTT <u>GCCGCGG</u> CACACACGTA-3'      |

<sup>a</sup> Underlined sequence reflects the introduction of a restriction site sequence.

**Table S3** TF disruptant clones displaying a reduction in FLC MIC in RPMI (48 hr), rescreened in YPD (24 hr)

| Clone ID    | CGD           | orf19 designation | MIC ( $\mu\text{g/ml}$ ) |       | MFC ( $\mu\text{g/ml}$ ) |     |
|-------------|---------------|-------------------|--------------------------|-------|--------------------------|-----|
|             |               |                   | RPMI                     | YPD   | RPMI                     | YPD |
| SNI152 (WT) | --            | --                | 0.25                     | 0.5   | >4                       | >64 |
| TF3         | <i>RPN4</i>   | orf19.1069        | 0.0625                   | 0.25  | 0.125                    | 32  |
| TF4         | --            | orf19.1253        | SG <sup>a</sup>          | 0.5   | SG                       | >64 |
| TF33        | <i>CAS5</i>   | orf19.4670        | 0.125                    | 0.25  | 4                        | 2   |
| TF45        | <i>GALA</i>   | orf19.5338        | 0.125                    | 0.5   | >4                       | >64 |
| TF59        | <i>ACE2</i>   | orf19.6124        | 0.03125                  | 0.5   | 2                        | >64 |
| TF77        | <i>UPC2</i>   | orf19.391         | 0.03125                  | 0.125 | 1                        | 1   |
| TF82        | <i>STP4</i>   | orf19.909         | 0.125                    | 0.5   | >4                       | >64 |
| TF95        | <i>NDT80</i>  | orf19.2119        | 0.03125                  | 0.5   | >4                       | >64 |
| TF103       | <i>HFL1</i>   | orf19.3063        | NG <sup>a</sup>          | NG    | NG                       | NG  |
| TF104       | <i>CZF1</i>   | orf19.3127        | 0.0625                   | 0.5   | 0.25                     | 8   |
| TF126       | <i>RIM101</i> | orf19.7247        | 0.0625                   | 0.5   | >4                       | 4   |
| TF127       | <i>ISW2</i>   | orf19.7401        | 0.0625                   | 0.25  | >4                       | 16  |
| TF155       | <i>DAL81</i>  | orf19.3252        | 0.0625                   | 0.5   | 4                        | >64 |
| TF158       | <i>RAP1</i>   | orf19.1773        | 0.03125                  | 0.5   | >4                       | >64 |
| TF159       | --            | orf19.1757        | 0.03125                  | 0.5   | >4                       | >64 |
| TF160       | --            | orf19.2743        | 0.03125                  | 0.5   | >4                       | >64 |
| TF163       | <i>RFX1</i>   | orf19.3865        | 0.0078125                | 0.25  | >4                       | >64 |
| TF164       | <i>RGT1</i>   | orf19.2747        | 0.0625                   | 0.5   | >4                       | >64 |
| TF165       | <i>PPR1</i>   | orf19.3986        | 0.03125                  | 0.25  | >4                       | >64 |

<sup>a</sup> Abbreviations: Slow growth (SG), No growth (NG)
